# Supplementary material
Source: PubMed Central journal article supplement (PMC2868389)
Supplement: supp_51_4_1873__1.pdf [file supp_51_4_1873__1.pdf]

**Supplementary Table S1. SNPs examined in gene x environment analyses**

| <i>Gene Name</i>                                                     | <b>SNP</b>                                   | <b>Base Pair (bp) Position</b> | <b>SNP Function</b> |
|----------------------------------------------------------------------|----------------------------------------------|--------------------------------|---------------------|
| <i>Complement factor H (CFH)</i><br>(Chromosome 1)                   | rs529825                                     | 194901729                      | Intron              |
|                                                                      | rs1061147                                    | 194920947                      | Coding exon A307A   |
|                                                                      | rs1061170                                    | 194925860                      | Coding exon H402Y   |
|                                                                      | rs4658046                                    | 194937380                      | Intron              |
|                                                                      | rs2019724                                    | 194941540                      | Intron              |
|                                                                      | rs1831281                                    | 194947437                      | Intron              |
|                                                                      | rs3753395                                    | 194953275                      | Intron              |
|                                                                      | rs3753396                                    | 194962365                      | Coding exon Q672Q   |
|                                                                      | rs1065489                                    | 194976397                      | Coding exon E936D   |
|                                                                      | rs460897                                     | 194982942                      | Coding exon S1191L  |
|                                                                      | rs460184                                     | 194982960                      | Coding exon V1197A  |
| <i>Complement factor H-related 3 (CFHR3)</i><br>(Chromosome 1)       | rs445207                                     | 195016368                      | Intron              |
|                                                                      | rs389897                                     | 195025053                      | Intron              |
| <i>Complement factor H-related 1 (CFHR1)</i><br>(Chromosome 1)       | rs388862                                     | 195063915                      | Coding exon E175Q   |
| <i>Complement factor B preproprotein (CFB)</i><br>(Chromosome 6)     | rs9332739                                    | 32011783                       | Coding exon E318D   |
|                                                                      | rs547154                                     | 32018917                       | Intron              |
|                                                                      | rs12614                                      | 32022158                       | Coding exon R32W    |
|                                                                      | rs641153                                     | 32022159                       | Coding exon R32Q    |
|                                                                      | rs1048709                                    | 32022914                       | Coding exon R150R   |
|                                                                      | rs2072633                                    | 32027557                       | Intron              |
| <i>Age-related macular degeneration 2 (ARMS2)</i><br>(Chromosome 10) | rs10490923                                   | 124204241                      | Coding exon R73H    |
|                                                                      | rs2736911                                    | 124204345                      | Coding exon R38X    |
|                                                                      | rs10490924                                   | 124204438                      | Coding exon A69S    |
|                                                                      | rs17623531                                   | 124204911                      | Intron              |
|                                                                      | A124205188G                                  | 124205188                      |                     |
|                                                                      | rs3750848                                    | 124205305                      | Intron              |
|                                                                      | rs3750846                                    | 124205555                      | Intron              |
|                                                                      | rs2736912                                    | 124205584                      | Intron              |
| rs10664316                                                           | 124206375                                    | Intron                         |                     |
| <i>HtrA serine peptidase 1 (HTRA1)</i> (Chromosome 10)               | rs11200638                                   | 124210534                      | Promoter            |
| <i>Apolipoprotein E (APOE)</i><br>(Chromosome 19)                    | APOE<br>Epsilon (E) 2 and E4<br>risk alleles |                                | Coding exon         |
| <i>Complement component 3 (C3)</i><br>(Chromosome 19)                | rs1047286                                    | 6664262                        | Coding exon P314L   |
|                                                                      | rs2230199                                    | 6669387                        | Coding exon R102G   |
